# Supplementary material for: Pan-genome inversion index reveals evolutionary insights into the subpopulation structure of Asian rice
Source: PubMed Central journal article supplement (PMC10030860; doi:10.1038/s41467-023-37004-y), 2023-03-21
Supplement: 41467_2023_37004_MOESM1_ESM.pdf [file 41467_2023_37004_MOESM1_ESM.pdf]

**Pan-genome inversion index reveals evolutionary insights into the subpopulation structure of Asian rice**

*Zhou et al.*

## Supplementary Note 1. The 18-genome data package: sequencing, assembly, annotation and results

### Sequence and assemblies

The pan-genome of Asian rice includes 16 ultra high-quality genomes that represent the sub-population structure level of the 3K-RGP data set, including: 1) 15 platinum standard reference sequences (PSRefSeqs), and 2) the previously published IRGSP RefSeq<sup>1-3</sup> (Table 1).

In addition, chromosome-level reference assemblies for two wild species - *i.e.* *O. rufipogon* (AA), and *O. punctata* (BB) were generated using long-read sequencing technology. PacBio subreads were first assembled *de novo* into contigs using genome assembly programs: FALCON (v0.5)<sup>4</sup>, MECAT2 (20190314)<sup>5</sup>, and Canu1.5<sup>6</sup>. Genome Puzzle Master (GPM, <https://github.com/Jianwei-Zhang/LIMS>) software<sup>7</sup> was used to merge the *de novo* assembled contigs from the three assemblers, using the MH63 genome sequence as a guide. The assembled genome sequences of *O. rufipogon*, and *O. punctata* were then polished using PacBio long reads and Illumina short reads in SMRTlink6.0 (<https://github.com/WenchaoLin/SMRT-Link>).

These assemblies have sizes of 461 and 422 Mb, with contig N50s of 32.5 Mb and 33.1 Mb, for *O. rufipogon* (AA), and *O. punctata* (BB) respectively (Table 1 and Supplementary Table 4). Only 7 and 16 gaps remain for the *O. rufipogon* and *O. punctata* genomes (Supplementary Table 4), respectively. Data for these new genomes can be found in Genbank (<https://www.ncbi.nlm.nih.gov/>) under public BioProjects PRJNA609053 (*O. rufipogon*) and PRJNA13770 (*O. punctata*) (Supplementary Table 4).

BUSCO scores for the two new assemblies were 97.90% (*O. rufipogon*) and 97.00% (*O. punctata*) (Supplementary Table 4). Of note, 16 BUSCO genes were missing in the *O. rufipogon* genome sequence, which were also absent in all *O. sativa* genomes as well<sup>3</sup>. However, 2 (EOG093605AK and EOG09360AWY) out of these 16 genes could be identified in *O. punctata* (BB genome) (Supplementary Table 2). Combined with our previous analysis of Asian rice and maize<sup>3</sup>, 14 BUSCO genes are absent in the *Oryza* genus, 12 of which are absent in both the *Oryza* genus and *Zea mays* (Supplementary Table 2).

The assembly and conserved gene content statistics for the *O. rufipogon* and *O. punctata* genomes demonstrate their high-quality, genome-wide contiguity, and completeness. Hence, we regard both assemblies as PSRefSeqs, as previously reported for Asian rice<sup>1-3</sup>.

### **Asian rice pan-genome annotation**

To minimize bias associated with different methods of gene and repeat finding, we applied a uniform set of annotation protocols (implemented through MAKER-P<sup>8</sup>) to 16 Asian rice PSRefSeqs (see methods). To accomplish this task, we integrated both Illumina baseline RNA-Seq data (RNA-Seq database#1) with PacBio Iso-Seq data, isolated independently from similar tissues (*i.e.* young leaves, roots, and panicles) (Supplementary Table 1). As a result, we annotated on average 36,347 genes, with an average length 3,448 bp (Supplementary Table 3). These annotations resulted in an expected AED distribution (Supplementary Fig. 1), and BUSCO scores greater than 97.5% for both transcript and protein models (Supplementary Table 4).

### **Transposable element content**

We re-annotated transposable elements (TEs) and investigated TE related sequence (TE-RS) content in the inversions across our 18-genome data set. The overall amount of TE-RSs ranged from 47.41% (*O. sativa* XI-3A LIMA) to 56.54% (*O. rufipogon*) with an average of 51.26% across all 18 genomes (Table 1, Supplementary Data 9).

## **Supplementary Note 2. Public high-quality rice genome sequences collection and selection**

To generate a powerful inversion index for Asian rice, we collected a total of 112 genomes in this study, including the 18-genome data package, and 94 recently sequenced genomes by long-read technologies, *i.e.*, 29 genomes sequenced with PacBio<sup>9</sup> and 65 genomes sequenced with Oxford Nanopore Technology (ONT)<sup>10</sup>.

To evaluate each genome assembly, we first compared Contig N50s of all 112 genomes and found that all had Contig N50s > 3 Mb (Supplementary Data 2). However, when all three studies were compared with respect to both Contig N50 size and number of contigs, the 18-genome data package showed the highest overall quality (Supplementary Fig. 3a and 3b).

Next, the 112 genomes were aligned to the IRGSP RefSeq using *mummer*<sup>11</sup> to look for possible miss assemblies. This analysis revealed that 37 out of 65 ONT genomes had large fragmental translocation (> 5 Mb) that were not validated and were thus filtered out of our analysis. An example of both a retained and filtered genome can be found in Supplementary Fig. 3c and 3d, respectively. The remaining 75 high-quality genomes, *i.e.*, 18-genome data package, 29 new sequenced PacBio genomes and 28 new sequenced ONT genomes, were retained for further investigations.

### **Supplementary Note 3. Genomic inversion identification workflow**

To discover inversions, we first tested four different analysis workflows (see methods) by comparing two *O. sativa* genomes, *i.e.*, *GJ-temp*: IRGSP-1.0 and *XI-adm*: MH63 genomes. We identified 25, 131, 55 and 235 raw inversions based on the 4 workflows, respectively (Supplementary Table 5). Following assessments by dot-plots, 22 (72%), 39 (29.8%), 33 (60%) and 178 (75.7%) raw inversions were confirmed (Supplementary Fig. 4a) for the 4 workflows, respectively, and the false positive ones were filtered out (Supplementary Fig. 4b). In comparison to workflow 4, workflows 1, 2 and 3 identified only 10%, 21.7% and 18.3% of all inversions, respectively (Supplementary Table 5). Upon detailed inspection, we determined that workflow 4 captured the overall majority of true large inversions.

### **Supplementary Note 4. Machine learning study to measure inversion frequencies across the 3K-RGP data set**

To determine the frequency of the inversions detected in the inversion index across the 3K-RGP data set, we trained a machine learning sequential model with 8,720 manually curated alignment patterns (872 inversions across 10 samples). Of note: 80% of these patterns were used for training the model, and another 20% were used for validation. The training model was used to test 30,520 inversion alignment patterns (872 inversions from 35 samples), with a further 5-fold cross validation and correction. The 39,240 manually curated inversion events from 45 samples were then used for training with 5 cross checks, with accuracy reaching > 98% and > 96% for training and validation, respectively (Supplementary Fig. 6c). Five independently trained tests were used to predict inversion events from remaining samples of the 3K-RGP data set, composed of 2,597,688 alignment patterns (872 inversions for 2,979 samples). Three rounds of 2,000 randomly selected events from the uniform results of 5

independent tests were further manually validated, and the results showed accuracies ranging from 94.6% to 100% (Supplementary Table 8).

Based on the observations of Asian rice specific inversions across the 3K-RGP data set, inversion frequencies were studied for each subpopulation. Samples were filtered that had missing data of 30% or greater, and the remaining 631 inversions across 2,751 samples were retained for further analysis (Supplementary Data 7). We used a threshold of observed inversion frequency (OIF) of 0.03 in this study for inversion categories. In doing so, inversions were classified into four groups: 1) genome-specific inversions, *i.e.* the inversions could be observed in only one or only a few (OIF < 0.03) 3K-RGP accessions; 2) subpopulation specific inversions, *i.e.* the inversions could be mainly observed in one of subpopulations but not others (OIF > 0.03); 3) Group-specific inversions, *i.e.* the inversions could be observed in one of groups, *e.g.*, only observed either in *Geng/Janponica* (GJ) group, *Xian/Indica* (XI) group, *circum-Aus* (cA) group, or *circum-Basmati* (cB) group genomes, respectively; and 4) shared inversions, *i.e.*, the inversions could be observed in more than one subpopulation or group.

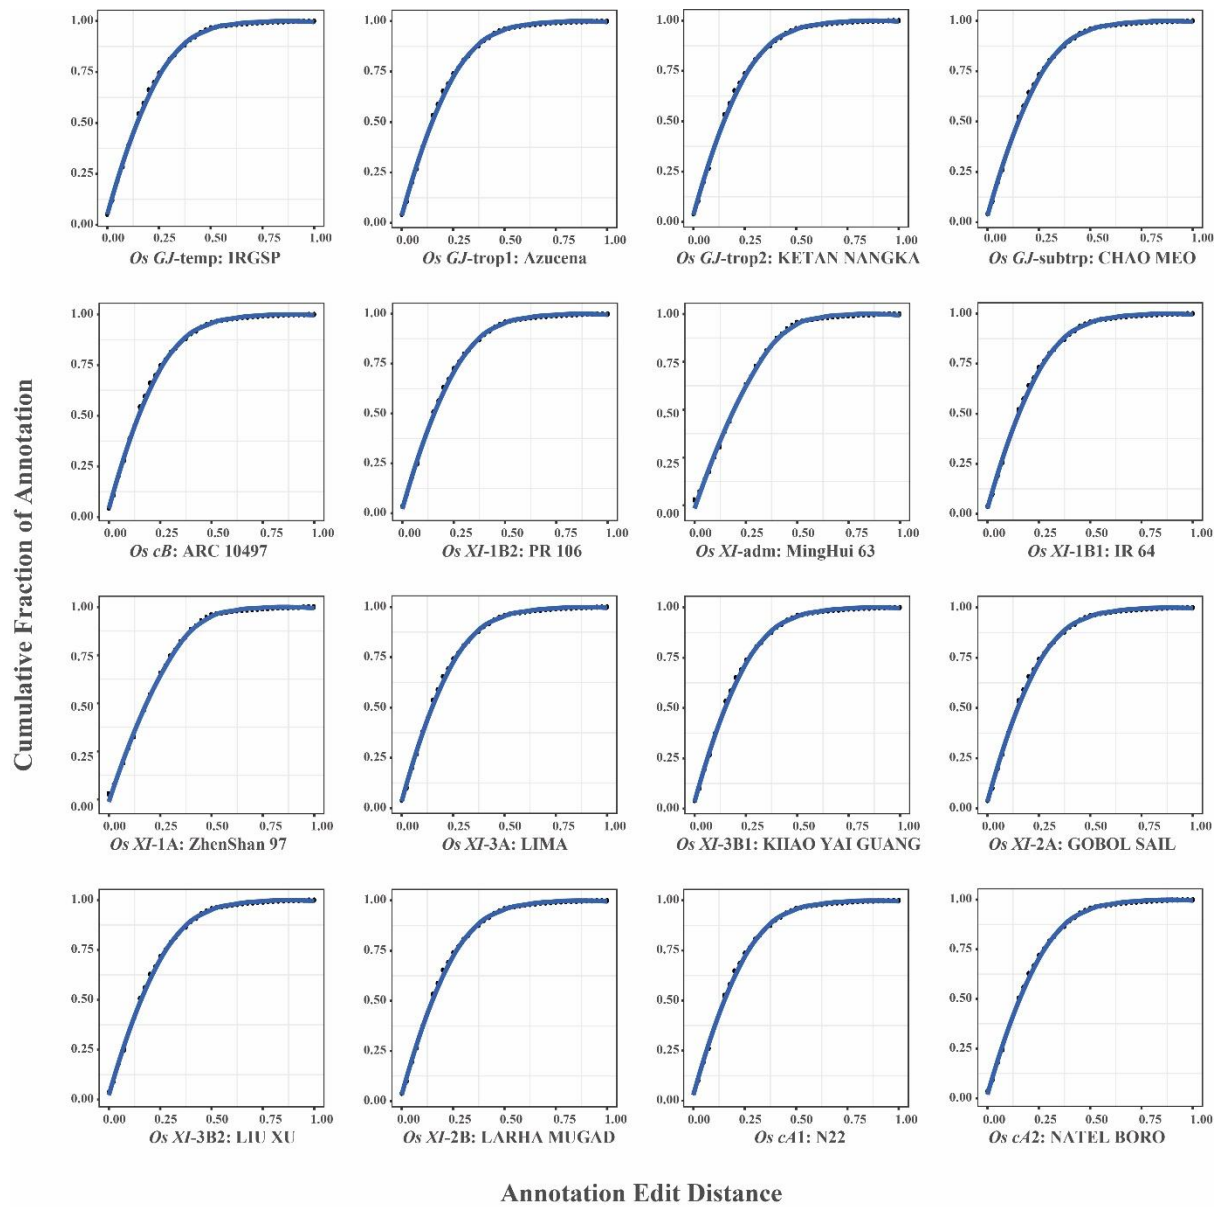

**Supplementary Fig. 1. Cumulative AED distributions of 16 genomes and their annotations were plotted. Source data are provided as a Source Data file.**

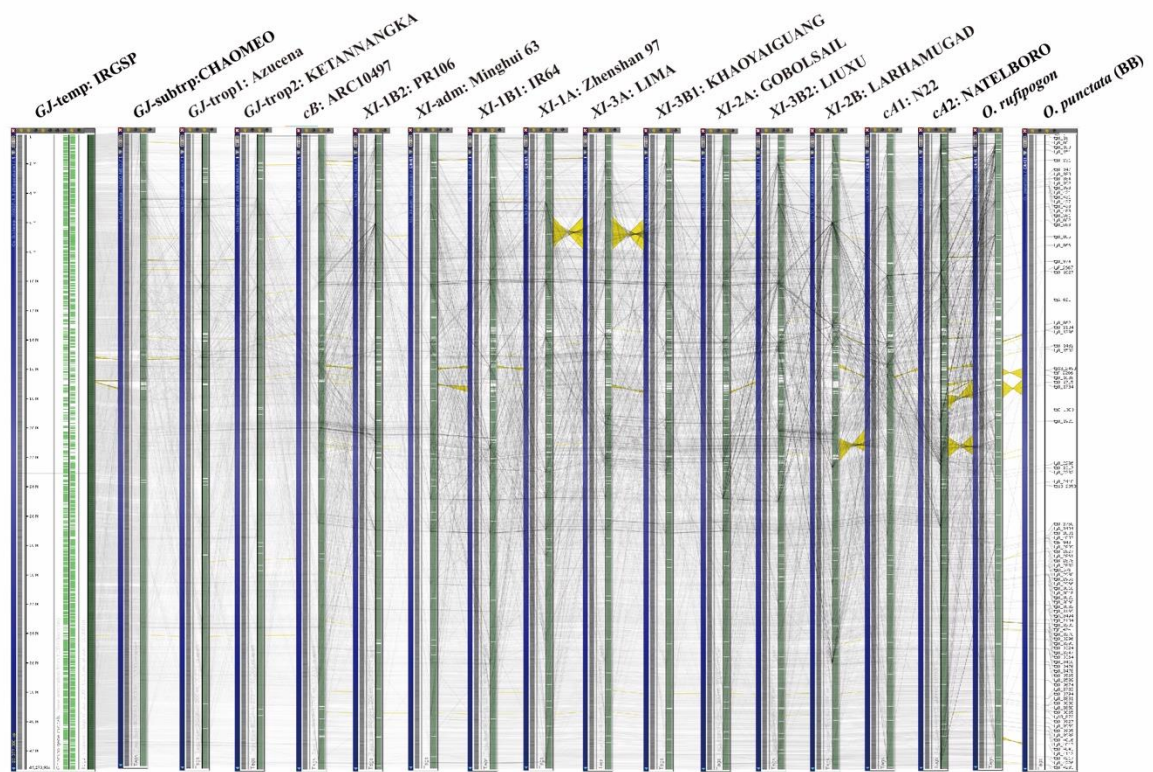

**Supplementary Fig. 2. A panel showing the overall alignments of the 18-genome data packaged using chromosome 1 as an example in Persephone (<https://web.persephonesoft.com/>). Gray lines show the alignments of sequence tags and the yellow ribbons show the inversions.**

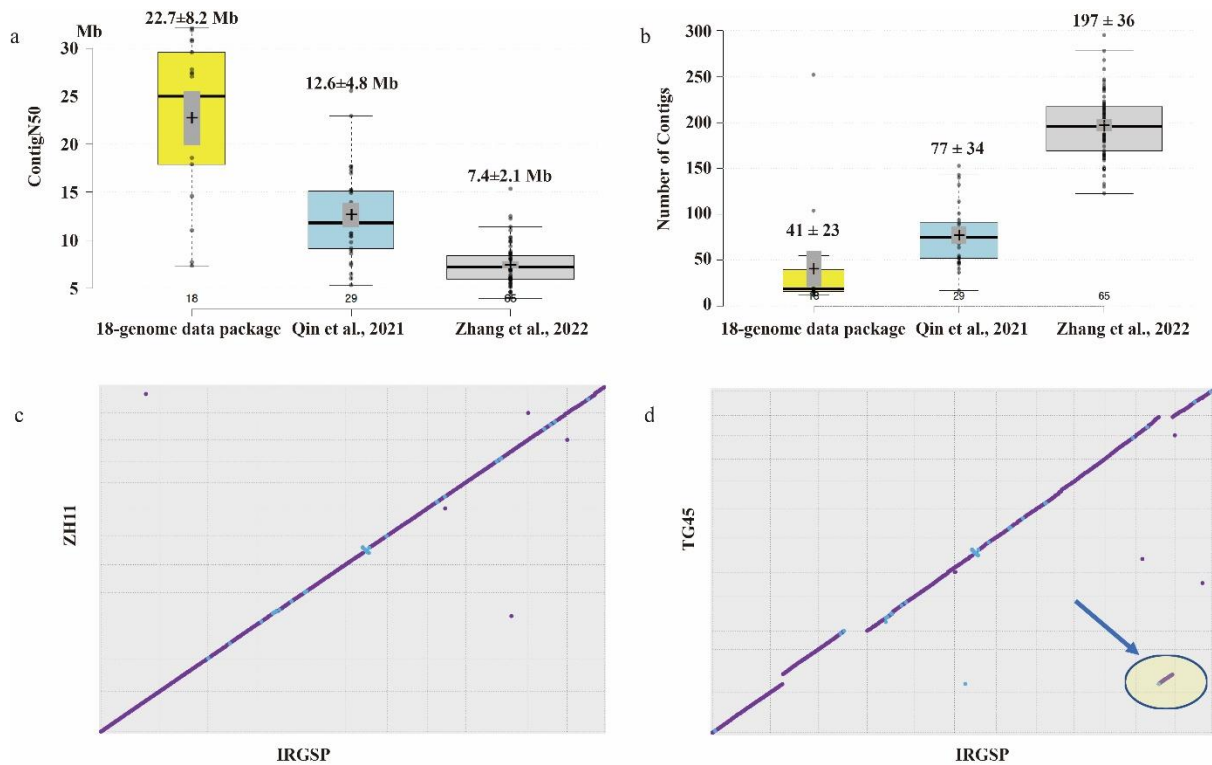

**Supplementary Fig. 3. Genome quality of 112 genomes collected in this study.**

a. and b. Comparisons of contigN50s and the number of contigs from the sequences of the 18-genome data package (n = 18), genomes (n = 65) from Qin et al., 2021, and genomes (n = 65) from Zhang et al., 2022, respectively. Each boxplot presents the minimum, first quartile, median, third quartile, and maximum value, and along with mean  $\pm$  SD (Standard Deviation) are shown. C. and d. An example of the 75 genomes that were retained (e.g., ZH11) and 28 genomes were filtered out (e.g., TG45) based on genome-wide alignment validations with the IRGSP RefSeq. A comparison with TG45 detected a  $>5$  Mb translocation from chromosome 11 to 2, however, the genome had not been validated by a third technology (e.g., Bionano optical map) and was, therefore, filtered from our inversion analysis. Source data are provided as a Source Data file.



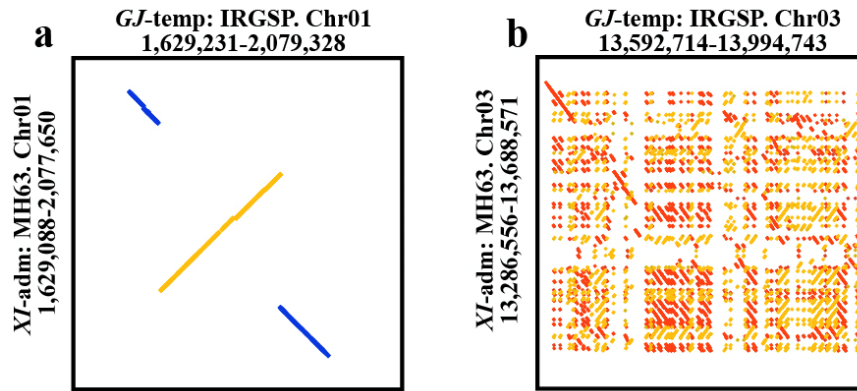

**Supplementary Fig. 4. Assessment example of inversions across the 18 PSRefSeqs.**

True positives show (a) clean inverted regions and breakpoints. False positives (b) are mostly due to the incorrect assessment of tandemly repeated regions.

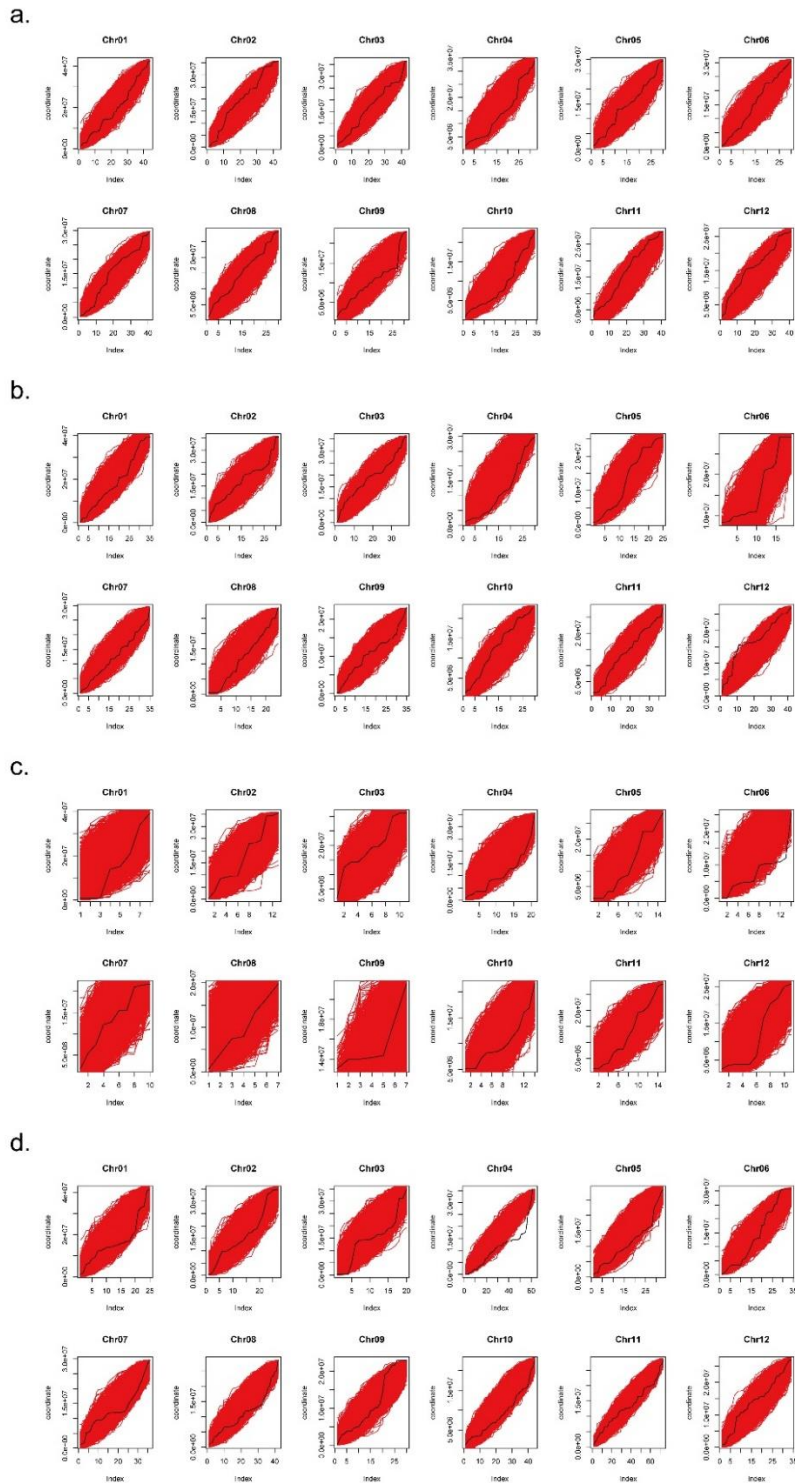

**Supplementary Fig. 5. Kolmogorov-Smirnov (KS) distribution test for the pan-genome inversion index of rice.**

The KS test for uniformity distribution of inversions across 12 rice chromosomes with different length categories, *i.e.*, a.  $< 1\text{ Kb}$ , b.  $1 - 5\text{ Kb}$ , c.  $5 - 10\text{ Kb}$ , d.  $> 10\text{ Kb}$ . The black line is the actual inversion distribution, and the red line is the 10,000<sup>th</sup> uniformly distributed simulation. Source data are provided as a Source Data file.

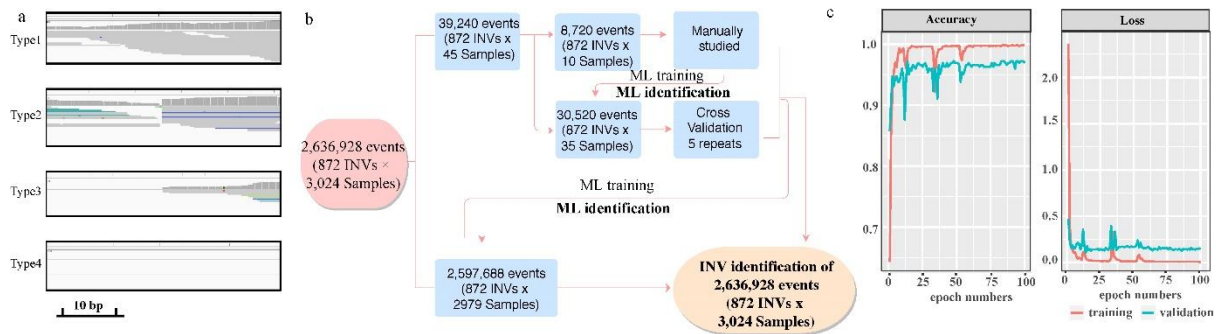

**Supplementary Fig. 6. Machine learning analysis of inversion alignment patterns across the 3K-RGP data set.**

a. Four different alignment patterns were observed. The Type 1 pattern shows that the inversion coordinates were covered by short read alignments of an accession but no breakpoints were observed, which means the inversion event is absent in this accession. The Type 2 pattern shows that the inversion coordinates were covered by short read alignments of an accession and the breakpoints were observed, which means the inversion event is present in this accession. The Type 3 pattern shows that the inversion coordinates were covered by short read alignments of an accession and half of breakpoints were observed, which means the inversion event is present in this accession, but is accompanied with a deletion or another as yet to be determined, genomic rearrangement. The Type 4 pattern shows that the inversion coordinates were not covered by short read alignments of an accession, and if the breakpoints were not able to be observed, the inversion event is not present in this case. b. Workflow used for training the model with manually curated data, and predictions for unknown data. c. Accuracy and loss assessment of the model with 5 cross checks for 100 generations. Source data are provided as a Source Data file.

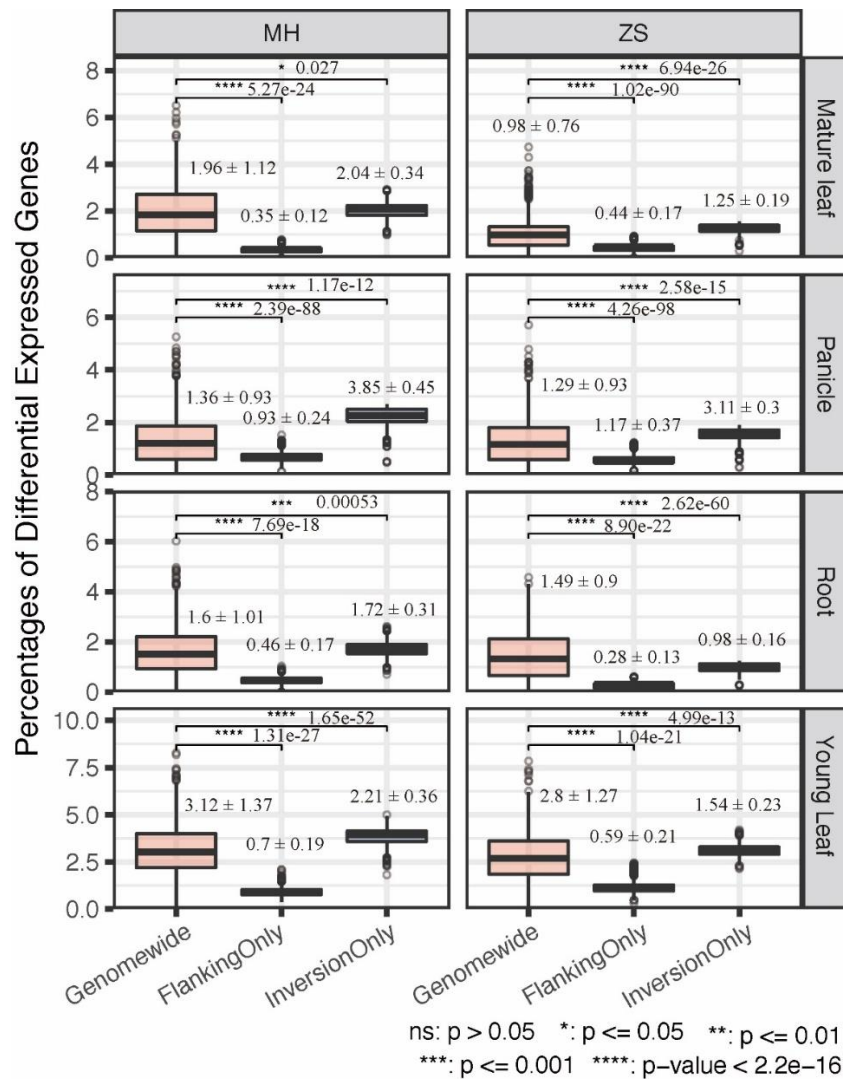

**Supplementary Fig. 7. Analysis of differentially expressed genes (DEGs) located within and flanking inversions compared with controls.**

DEGs analysis, from RNA-Seq dataset #2, located in inverted regions, flanking regions vs. a set of randomly selected non-inverted regions (20 Kb,  $n = 1,000$ ). The DEGs from both Minghui 63 (MH) and Zhenshan 97 (ZS) were compared with IRGSP RefSeq. The percentages of DEGs of three regions (*i.e.*, within inversions, flanking regions, and resampled non-inverted 20 Kb genome-wide regions) are shown with boxplots and compared by a two tailed *t*-test. Each boxplot presents the minimum, first quartile, median, third quartile, and maximum value, and along with mean  $\pm$  SD (Standard Deviation) are shown. Source data are provided as a Source Data file.

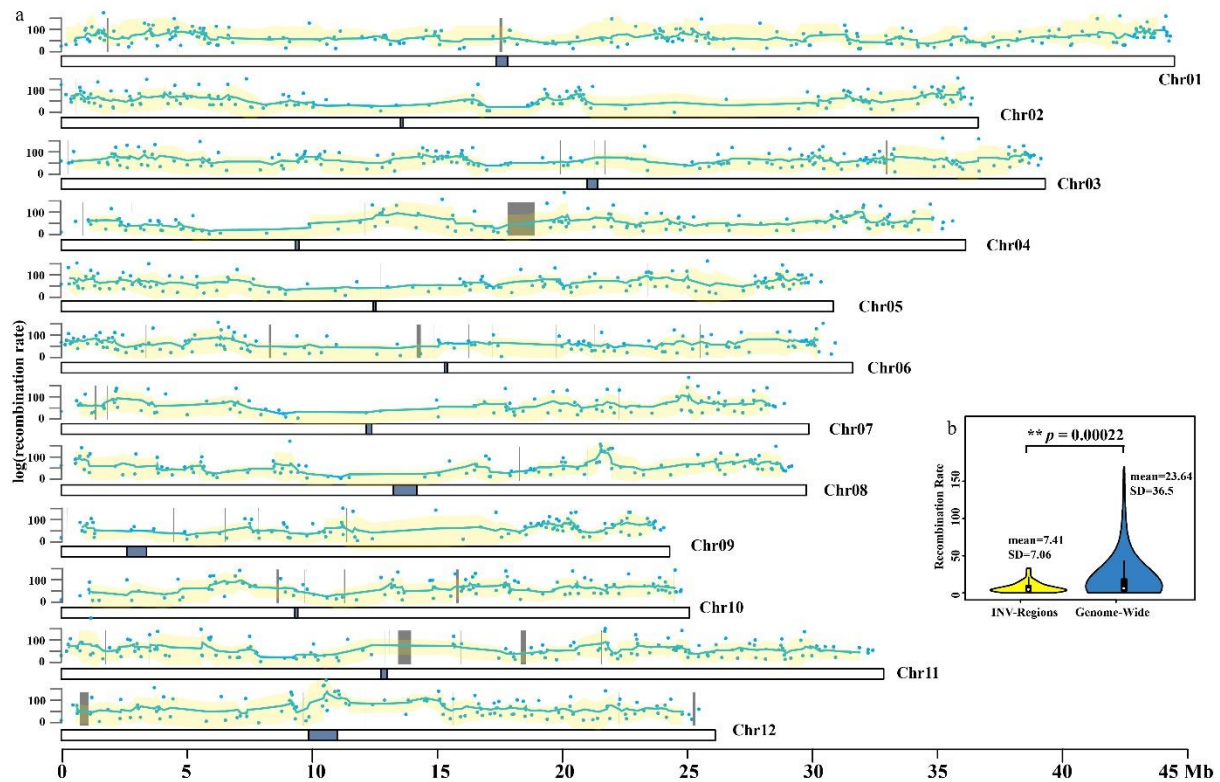

**Supplementary Fig. 8. Recombination rate variation between inverted and non-inverted regions of a recombinant inbred mapping population.**

a. Recombination rate of a RIL mapping population (Minghui 63 × Zhenshan 97). Dots indicate the recombination rate and gray boxes indicate inversions. Blue lines and yellow shades present the average and range of recombination rate for 100 Kb window regions along the chromosomes (rectangles). Blue boxes along the chromosomes indicate the centromeres. b. Comparison of recombination rate across inversions ( $n = 78$ ) vs. genome-wide ( $n = 1536$ ) ( $F$ -test in the ANOVA). Each violin plot presents the minimum, first quartile, median, third quartile, and maximum value, and along with mean and SD (Standard Deviation) values are shown. Source data are provided as a Source Data file.

**Supplementary Table 1. PacBio Iso-Seq and RNA-Seq transcripts used for genome annotation.**

| Acronyms | Iso-Seq |        |         | RNA-Seq |        |         |
|----------|---------|--------|---------|---------|--------|---------|
|          | Leaf    | Root   | Panicle | Leaf    | Root   | Panicle |
| IRGSP    | 19,101  | 26,760 | 31,356  | 40,689  | 42,513 | 35,478  |
| CMeo     | 26,589  | 28,501 | 23,492  | 22,016  | 26,372 | 46,613  |
| Azu      | 29,209  | 33,939 | 27,423  | 23,145  | 25,382 | 39,385  |
| KeNa     | 17,148  | 15,960 | 24,992  | 18,847  | 26,409 | 40,157  |
| ARC      | 25,932  | 25,265 | -       | 20,523  | 28,897 | -       |
| PR106    | 31,088  | 44,374 | 23,645  | 31,949  | 31,314 | 47,161  |
| IR64     | 19,168  | 31,556 | 21,988  | 23,221  | 30,118 | 43,614  |
| Lima     | 32,067  | 26,603 | -       | 21,724  | 21,322 | -       |
| KYG      | 31,036  | 43,031 | -       | 22,317  | 27,844 | -       |
| GoSa     | 10,565  | 42,680 | -       | 16,510  | 22,062 | -       |
| LiXu     | 23,628  | 31,519 | 13,159  | 27,391  | 31,386 | 30,855  |
| LaMu     | 29,618  | 38,265 | -       | 20,476  | 29,311 | -       |
| N22      | 43,709  | 50,872 | 26,818  | 21,821  | 26,431 | 35,043  |
| NaBo     | 37,614  | 41,834 | 24,811  | 22,208  | 31,537 | 38,038  |

**Supplementary Table 2. BUSCO evaluation of the *O. rufipogon* (AA) and *O. punctata* (BB) genomes compared with Asian rice pan-genome missing genes<sup>3</sup>.**

| Assembly            | C            | S              | D            | F            | M            | Absented genes in the 18-genome datapackage                                                                                                                                                                                                                                                                                       |
|---------------------|--------------|----------------|--------------|--------------|--------------|-----------------------------------------------------------------------------------------------------------------------------------------------------------------------------------------------------------------------------------------------------------------------------------------------------------------------------------|
| <i>O. rufipogon</i> | 409<br>(98%) | 398<br>(97.1%) | 11<br>(0.8%) | 3<br>(0.2%)  | 28<br>(1.9%) | EOG093603UO(abc),<br>EOG093603VZ(abc),<br>EOG0936041Q(abc),<br>EOG093608FN(abc),<br>EOG0936091T(abc),<br>EOG093609SU(abc),<br>EOG09360AW4(abc),<br>EOG09360BID(abc),<br>EOG09360CFL(abc),<br>EOG09360CH3(abc),<br>EOG09360MYG(abc),<br>EOG09360TV2(abc),<br>EOG093605AK(ab),<br>EOG09360AWY(ab),<br>EOG093606SW(a) EOG093601AL(a) |
| <i>O. punctata</i>  | 397<br>(97%) | 390<br>(96.5%) | 7<br>(0.5%)  | 10<br>(0.7%) | 33<br>(2.3%) |                                                                                                                                                                                                                                                                                                                                   |

C: Complete BUSCOs

S: Complete and single-copy BUSCOs

D: Complete and duplicated BUSCOs

F: Fragmented BUSCOs

M: Missing BUSCOs

a: absent in all Asian and African genomes (AA genome)

b: absent in all *O. punctata* (BB genome)

c: absent in all *Zea mays*

**Supplementary Table 3. Genome annotation statistics of 16 rice genomes.**

| Accession | No. of genes-whole genome-Chr-level | Avg. length of gene (bp) | # of cDNA/CDS/proteins | Avg. length of cDNA (bp) | Avg. length of CDSs (bp) | Avg. length of proteins (aa) |
|-----------|-------------------------------------|--------------------------|------------------------|--------------------------|--------------------------|------------------------------|
| IRGSP     | 37,140                              | 3,380                    | 44,983                 | 1,519                    | 1,187                    | 395                          |
| CMeo      | 36,601                              | 3,430                    | 45,044                 | 1,548                    | 1,194                    | 397                          |
| Azu       | 36,623                              | 3,436                    | 44,364                 | 1,552                    | 1,198                    | 398                          |
| KeNa      | 36,609                              | 3,465                    | 44,022                 | 1,535                    | 1,191                    | 396                          |
| ARC       | 36,423                              | 3,427                    | 43,439                 | 1,526                    | 1,188                    | 395                          |
| PR106     | 36,405                              | 3,493                    | 44,346                 | 1,545                    | 1,196                    | 397                          |
| MH63      | 36,147                              | 3,621                    | 52,024                 | 1,724                    | 1,210                    | 402                          |
| IR64      | 36,065                              | 3,480                    | 43,965                 | 1,549                    | 1,199                    | 398                          |
| ZS97      | 35,686                              | 3,675                    | 50,681                 | 1,719                    | 1,224                    | 407                          |
| Lima      | 36,217                              | 3,448                    | 43,521                 | 1,503                    | 1,178                    | 391                          |
| KYG       | 36,212                              | 3,445                    | 43,155                 | 1,511                    | 1,184                    | 393                          |
| GoSa      | 36,222                              | 3,453                    | 42,380                 | 1,496                    | 1,178                    | 391                          |
| LiXu      | 36,378                              | 3,416                    | 43,497                 | 1,484                    | 1,167                    | 388                          |
| LaMu      | 36,299                              | 3,414                    | 42,947                 | 1,502                    | 1,177                    | 391                          |
| N22       | 36,262                              | 3,461                    | 43,845                 | 1,539                    | 1,194                    | 397                          |
| NaBo      | 36,196                              | 3,459                    | 43,220                 | 1,517                    | 1,187                    | 394                          |
| Average   | 36,343                              | 3,469                    | 44,715                 | 1,548                    | 1,191                    | 396                          |



**Supplementary Table 4. Sequencing, data statistics of genomic features, and BUSCO evaluation of *de novo* assemblies for 2 new wild *Oryza* genomes, i.e., *O. rufipogon* (AA) and *O. punctata* (BB).**

| Variety name             | <i>O. rufipogon</i> -AA (wild Asian rice) | <i>O. punctata</i> -BB (outgroup) |
|--------------------------|-------------------------------------------|-----------------------------------|
| Sequencing platform      | PacBio Sequel                             | PacBio Sequel                     |
| Raw data (Gb)            | 66.09                                     | 47.94                             |
| Depth                    | 142.88                                    | 113.50                            |
| Number of subreads (M)   | 3.00                                      | 5.05                              |
| Mean subread length (Kb) | 22.02                                     | 9.50                              |
| N50 subread length (Kb)  | 37.01                                     | 16.20                             |
| Assembled Size (Mb)      | 462.58                                    | 422.39                            |
| Contig N50 length (Mb)   | 32.50                                     | 33.10                             |
| # Gaps                   | 7                                         | 16                                |
| Complete BUSCOs          | 97.90%                                    | 97.00%                            |
| BioProject               | PRJNA609053                               | PRJNA13770                        |
| BioSample                | SAMN14209993                              | SAMN02981556                      |
| Genome Accession         | JAAMOU000000000                           | AVCL000000000                     |
| SRP                      | SRP251141                                 | SRP038011                         |

**Supplementary Table 5. The assessment of 4 workflows used to identify genomic inversions between the IRGSP-1.0 RefSeq and MH63 genome sequences.**

| Methods    | Aligner  | INV caller | Number of raw INV | Number of true INV | True INV of each workflow% | Missed in workflow4 | True INV of 4 workflows % | Reference                             |
|------------|----------|------------|-------------------|--------------------|----------------------------|---------------------|---------------------------|---------------------------------------|
| Work-flow1 | NGMLR    | SVIM       | 25                | 18                 | 72.0%                      | 1                   | 10.0%                     | Heller <i>et al.</i> <sup>24</sup>    |
| Work-flow2 | NGMLR    | Sniffles   | 131               | 39                 | 29.8%                      | 2                   | 21.7%                     | Sedlazeck <i>et al.</i> <sup>23</sup> |
| Work-flow3 | Minimap2 | SyRI       | 55                | 33                 | 60.0%                      | 0                   | 18.3%                     | Goel <i>et al.</i> <sup>26</sup>      |
| Work-flow4 | Nucmer   | SyRI       | 235               | 178                | 75.7%                      | NA                  | 98.9%                     | Goel <i>et al.</i> <sup>26</sup>      |

**Supplementary Table 6. Validation of a subset of inversions from the pan-genome inversion index using PacBio long read data.**

| <b>Genome</b> | <b>Number of INVs</b> | <b>Number of INVs could be supported by PacBio LongReads</b> |
|---------------|-----------------------|--------------------------------------------------------------|
| LaMu          | 78                    | 75                                                           |
| NaBo          | 74                    | 74                                                           |
| CMeo          | 35                    | 35                                                           |
| MH63          | 77                    | 74                                                           |
| Total         | 264                   | 258 (97.73%)                                                 |

**Supplementary Table 7. Four groups and 7 categories of inversions could be identified across the pan-genome inversion index of rice.**

| Group | Category | <i>O. punctata</i> | <i>O. rufipogon</i> | <i>O. sativa</i> | count | Description                                                                                                                   |
|-------|----------|--------------------|---------------------|------------------|-------|-------------------------------------------------------------------------------------------------------------------------------|
| S     |          |                    |                     |                  | 885   | Inversions segregating in <i>O. sativa</i>                                                                                    |
|       | S1       | 0                  | 0                   | $\geq 1$         | 872   | <i>O. sativa</i> specific, IRGSP-1.0 RefSeq has ancestral state                                                               |
|       | S2       | 1                  | 1                   | $\geq 1$         | 11    | <i>O. sativa</i> specific, IRGSP-1.0 RefSeq has derived state                                                                 |
|       | S3       | 1                  | 1                   | 0                | 2     | All <i>O. sativa</i> have derived state - an inversion fixed in <i>O. sativa</i>                                              |
| SR    |          |                    |                     |                  | 123   | Inversions segregating in both <i>O. sativa</i> and <i>O. rufipogon</i>                                                       |
|       | SR1      | 0                  | 1                   | $\geq 1$         | 121   | Originated before <i>O. sativa</i> and <i>O. rufipogon</i> split, or introgressions, IRGSP-1.0 RefSeq has the ancestral state |
|       | SR2      | 1                  | 0                   | $\geq 1$         | 2     | Originated before <i>O. sativa</i> and <i>O. rufipogon</i> split, or introgressions, IRGSP-1.0 RefSeq has the derived state   |
| R     |          |                    |                     |                  | 96    | <i>O. rufipogon</i> specific                                                                                                  |
|       | R        | 0                  | 1                   | 0                | 96    |                                                                                                                               |
| P     |          |                    |                     |                  | 322   | <i>O. punctata</i> specific or AA-fixed (ancestral state not clear)                                                           |
|       | E        | 1                  | 0                   | 0                | 322   |                                                                                                                               |

**Supplementary Table 8. Manual validation of inversions identified from machine learning.**

| <b>Manual-validation</b> | <b>Round1</b> | <b>Round2</b> | <b>Round3</b> | <b>Note</b>     |
|--------------------------|---------------|---------------|---------------|-----------------|
| Tag0                     | 97.00%        | 94.69%        | 96.75%        | Non-INV         |
| Tag1                     | 100.00%       | 99.50%        | 99.50%        | INV             |
| Tag3                     | 100.00%       | 100.00%       | 99.50%        | INV-pav         |
| Tag4                     | 99.50%        | 100.00%       | 99.50%        | Can't be define |

**Supplementary Table 9. Validation of 2,042 predicted inversions, of the same accessions used to create the Asian rice pan-genome, collected from the 3K-RGP data set.**

| <b>Length</b> | <b># total</b> | <b># true</b> | <b># false</b> | <b>% true</b> | <b>% false</b> |
|---------------|----------------|---------------|----------------|---------------|----------------|
| 0.1-1 kb      | 915            | 14            | 901            | 1.53%         | 98.47%         |
| 1-25 kb       | 825            | 123           | 702            | 14.91%        | 85.09%         |
| 25-250 kb     | 532            | 56            | 476            | 10.53%        | 89.47%         |
| 250 kb        | 130            | 7             | 123            | 5.38%         | 94.62%         |
| total         | 2,402          | 200           | 2,202          | 8.33%         | 91.67%         |

### Supplementary references

1. Kawahara, Y. *et al.* Improvement of the *Oryza sativa* Nipponbare reference genome using next generation sequence and optical map data. *Rice* **6**, 4 (2013).
2. Zhang, J. *et al.* Extensive sequence divergence between the reference genomes of two elite indica rice varieties Zhenshan 97 and Minghui 63. *Proc. Natl. Acad. Sci. USA* **113**, E5163-E5171 (2016).
3. Zhou, Y. *et al.* A platinum standard pan-genome resource that represents the population structure of Asian rice. *Sci Data* **7**, 113 (2020).
4. Chin, C.S. *et al.* Phased diploid genome assembly with single-molecule real-time sequencing. *Nat Methods* **13**, 1050-1054 (2016).
5. Xiao, C.L. *et al.* MECAT: fast mapping, error correction, and de novo assembly for single-molecule sequencing reads. *Nat Methods* **14**, 1072-1074 (2017).
6. Koren, S. *et al.* Canu: scalable and accurate long-read assembly via adaptive k-mer weighting and repeat separation. *Genome Res* **27**, 722-736 (2017).
7. Zhang, J. *et al.* Genome puzzle master (GPM): an integrated pipeline for building and editing pseudomolecules from fragmented sequences. *Bioinformatics* **32**, 3058-3064 (2016).
8. Campbell, M.S., Holt, C., Moore, B. & Yandell, M. Genome annotation and curation using MAKER and MAKER - P. *Current Protocols in Bioinformatics* **48**, 4.11. 1-4.11. 39 (2014).
9. Qin, P. *et al.* Pan-genome analysis of 33 genetically diverse rice accessions reveals hidden genomic variations. *Cell* **184**, 3542-3558 (2021).
10. Zhang, F. *et al.* Long-read sequencing of 111 rice genomes reveals significantly larger pan-genomes. *Genome Res* **32**, 853-863 (2022).
11. Delcher, A.L., Salzberg, S.L. & Phillippy, A.M. Using MUMmer to identify similar regions in large sequence sets. <https://doi.org/10.1002/0471250953.bi1003s00> (2003).
